It is made available under a [CC-BY 4.0 International license](https://creativecommons.org/licenses/by/4.0/) .

1 **Trends and the Prevalence of Metabolic Syndrome and its Associated**  
2 **Factors among Nepalese Adults in Ecological regions of Nepal- A**  
3 **Nationwide Cross - Sectional Survey.**

4 **Bhawana Bhandari\*<sup>1</sup>, Bihungum Bista<sup>2</sup>, Suna Laxmi Karmacharya<sup>3</sup>, Anil Babu Ojha<sup>4</sup>,**  
5 **Datin Mariani Ahmad Nizaruddin<sup>5</sup>, Suresh Mehata<sup>6</sup>**

6 1. Principal Author, Assistant Professor /PhD Scholar, University Of Cyberjaya.

7 2. PhD Scholar, Kathmandu University

8 3. Nursing Officer, Ministry of Health and Population,Nepal

9 4. Consultant Anaesthesiologist, Siddhi Memorial Children and Women Hospital, Nepal.

10 5. Assistant Professor, Department of Pharmacology, University of Cyberjaya, Malaysia.

11 6. Consultant, Policy, Planning and Public Health Division, Ministry of Health, Koshi  
12 Province, Nepal.

13 **Corresponding Author**

14 Bhawana Bhandari

15 Email: Bhandaribhawana114@gmail.com

16

17

18

19

20

21

22

## 23 Abstract

24 Globally, there is an increase in the Prevalence of Metabolic Syndrome. The rise in  
25 prevalence of Metabolic Syndrome suggests burden of Cardiovascular related morbidity and  
26 mortality which is also prevalent in Nepal. Metabolic Syndrome confers a 5-fold increase in  
27 the risk of Type 2 Diabetes Mellitus (T2DM) and 2-fold the risk of developing  
28 Cardiovascular Disease (CVD) over the next 5 to 10 years. Routine surveillance and registry  
29 system in Nepal related to Metabolic Syndrome are bare in Nepal which is imperative to  
30 determine the prevalence of MetS and its associated factors. This study used multistage  
31 cluster sampling considering the three ecological zones as strata. 259 Primary Sampling  
32 Units were selected randomly and a total of 5593 population were surveyed where 5051  
33 population met the criteria for determining the Prevalence of MetS. A STEPwise  
34 Surveillance was conducted using WHO Steps survey questionnaire 3.2 version by interview  
35 technique, physical and biochemical measurements. The result concluded that there was a  
36 decrease in trend of Prevalence of Metabolic Syndrome from 14.1% to 6.69%. from 2013 to  
37 2019. The overall Prevalence of MetS was found to be 6.69%, nearly double in women than  
38 in men (8.62% and 4.57% respectively). Waist circumference was found to be the most  
39 prevalent component of Metabolic Syndrome among women. Age, Sex, Education, Marital  
40 status, Wealth quintile and Ecological region were significantly associated with MetS and  
41 there was no significant association of MetS with behavioral factors.

42 **Keywords:** Trend, Prevalence, Metabolic Syndrome, Nepal, STEPS Survey, Waist  
43 Circumference, Associated Factors.

44

45

46

47

48

49

50

51

52

## 53 **Introduction**

54 Globally, present era is recognized for the burden for (NCDs) Non Communicable Disease  
55 [1]. Out of 51 million deaths, 41 million people die each year due to Non Communicable  
56 Disease equivalent to 71% of total deaths worldwide. Annually 17.9 million deaths occur  
57 due to cardiovascular disease which is the top most cause of death related to NCD [2]. In  
58 context to Nepal, the burden for NCDs is also high, where 66% of total deaths related to  
59 NCDs, 16% of total mortality is related with cardiovascular disease like Myocardial  
60 Infarction (MI). In 2017, 59% of total (9,015,320) DALYs are due to NCDs [3]. Behavioral  
61 risk factors including smoking, harmful use of alcohol, unhealthy diet and physical  
62 inactivity, low fruits and vegetable intakes along with Metabolic/biological risk factors such  
63 as raised blood pressure (BP), blood glucose and cholesterol level, overweight and obesity  
64 have been evidenced as the rich underlying causes of NCDs [4]. The Global Burden of  
65 Disease 2017 study reported that disease burden in Nepal could be reduced by addressing  
66 these risk factors [3].

67 Metabolic syndrome (MS) is defined as a cluster of metabolic risk factors including central  
68 obesity, dysglycemia, reduced high-density lipoprotein cholesterol (HDL-c), elevated  
69 triglycerides (TG) and hypertension [5]. MetS are at 2- to 4-fold increased risk of stroke, a 3-  
70 to 4-fold increased risk of Myocardial Infarction (MI), and 2-fold the risk of dying from such  
71 an event compared with those without Metabolic Syndrome [6]. The massive (and increasing)  
72 disease burden associated with cardiovascular disorders justifies public health measures such  
73 as screening, which may assist with the identification and treatment of individuals who have a  
74 high risk of developing these disorders [7]. Lifestyles, behaviors and genetic factors may  
75 contribute to the prevalence of MS [8]. Interventions that address obesity and reduce waist  
76 circumference and an appropriate diet may reduce the incidence of the Metabolic Syndrome in  
77 adults[9]. Screening is essential method for prior detection to identify the individual at risk to  
78 prevent from mortality and morbidity associated with Metabolic Syndrome[10].

79 Nepal lacks routine surveillance and registry system related to Metabolic Syndrome where  
80 baseline data are not enough to address in policy level which addresses its importance to  
81 analyze and determine the burden of MetS [11]. MetS remains unfocussed due lack of  
82 evidence at population level. At present, evidence based study of Mets representing the  
83 national level population comes to focused studies to prevent, minimize and manage the

It is made available under a [CC-BY 4.0 International license](https://creativecommons.org/licenses/by/4.0/) .

84 global burden of cardiovascular disease associated morbidity and mortality. Hence, the study  
85 aims for determining the trend and prevalence of MetS and its associated factor to reduce the  
86 cardiovascular burden addressing its importance in policy making and implementation and  
87 also recommendation for program like WHO PEN module in effective way to manage the  
88 Non communicable disease burden.

89

90

## 91 **Materials and Methods:**

92 **Study Site:** The study was conducted in three ecological regions of Nepal (Himalayan, Hilly  
93 and Terai region). (Fig 1)

### 94 **Study design, Sampling and Data collection**

95 This is a secondary analysis carried out using Non-Communicable Diseases risk factors  
96 Survey 2019 data. The detail methodology and report of the survey has been  
97 presented elsewhere [12]. In brief, the survey was a cross sectional study, carried out from  
98 February to May 2019 with aim to assess the risk factors of NCDs at entire population level  
99 in Nepal.

100 A multistage cluster sampling method was used to select 6,475 eligible participants across  
101 all 7 provinces from three ecological regions of Nepal. A total of 259 wards were selected as  
102 the primary sampling units (PSU) at the first stage, 37 PSUs from each province were  
103 selected in order to obtain provincial estimates. Secondly, household listing was carried out  
104 in 259 PSUs and list of the household was prepared.25 household per PSUs were selected  
105 using systematic random sampling. From each of the selected households, one adult member  
106 of age 15–69 years was randomly selected using KISH method through personalized  
107 computer entry system via android tablet. A total of 5593 individual participated in the  
108 survey. However, 5051 individual met the criteria for determining MetS. The response rate  
109 for STEPI, STEPII, STEPIII Survey was 86.7% (5593), 86.5%(5582) and 82.6%.  
110 (5350).Further details on the sampling process can be found elsewhere [12, 13].

111 We conducted face to face interviews using standardized questions from the WHO STEPS  
112 Survey (version 3.2) [14]—an update on the 2013 STEPs survey. STEP I survey collected  
113 information related to behavioral characteristics (tobacco use, alcohol use, physical activity,  
114 fruits and vegetables intake), STEP II Survey involves physical characteristics (height,  
115 weight and BP) and STEP III collected biochemical measures (Blood sugar, sodium level  
116 measurement in urine). Measurement of height (measured with portable standard stature tape

It is made available under a [CC-BY 4.0 International license](https://creativecommons.org/licenses/by/4.0/) .

117 SECA, Germany), Weight (measured using SECA weighing machine, Germany), BP  
118 (measured using OMRON BP monitor), blood sugar (measured using Cardiocheck PA) and  
119 blood cholesterol (measured using Cardiocheck PA) were made as per the WHO standards  
120 and STEPS manual. Household wealth was assessed on the basis of selected household  
121 characteristics (e.g. type of roof, access to electricity), means of transportation used and  
122 possession of selected consumer goods) which was used as indicator of economic status.  
123 Households were given scores based on the number and kind of consumer goods they own.  
124 The scores are derived using Principal Component Analysis (PCA). Details of the  
125 measurement process has been described elsewhere [12,15].

126 Analysis was performed with STATA version 15.1 using survey (*svy*) set command,  
127 defining clusters and sampling weight information. All estimates were weighted by sample  
128 weights in order to obtain the population estimates and are presented with 95% Confidence  
129 Intervals (CI). Prevalence estimates were calculated using Taylor series linearization. The  
130 trend in the study is the state of Prevalence of Metabolic Syndrome for increase, decrease or  
131 static. For this, the Prevalence Rate will be compared with that of 2013 STEPS survey data  
132 to 2019 STEPS survey data. Chi-square tests were used for bivariate analysis, to test  
133 associations between independent and dependent variables. Furthermore, multivariate  
134 Poisson regression was used to calculate the Adjusted Prevalence Ratio (APR) between each  
135 risk factors of Metabolic Syndrome and socio-demographic covariates (age, sex, education,  
136 marital status, province, ecological regions and place of residence) included simultaneously  
137 [16]. For clustering analysis of Metabolic Syndrome the numbers of risk factors present  
138 within each participant were summed (from 0 to 4). Bivariate analysis and multivariate  
139 analysis were analyzed against socio-demographic covariates through Poisson regression.  
140 The relationship between the number of risk factors and covariates were estimated through  
141 Adjusted Odd Ratios (AOR), with the count of risk factors designated as the dependent  
142 variable.

## 143 **Variable definition**

144 **The dependent variable:** Prevalence of Metabolic Syndrome.

145 **The independent variable:** Three major predictor variables were included:

- 146 i) **Individual characteristics:** age in years (15–29, 30–44 and 45–69), gender  
147 (male and female), marital status (never married, currently married and

It is made available under a [CC-BY 4.0 International license](https://creativecommons.org/licenses/by/4.0/) .

- 148 divorced/widowed/separated), education (no formal schooling, primary,  
149 secondary and higher level) and wealth quintile.
- 150 ii) **Community characteristics:** Ecological zone (Mountain, Hill and Terai/ plains)  
151 and place of residence (urban and rural) in this analysis.
- 152 iii) **Behavioral characteristics:** smoking tobacco, alcohol consumption, intake of  
153 fruits and vegetables and physical activity.

154 For this study, current smoking, harmful use of alcohol, insufficient fruit and vegetable  
155 intake, insufficient physical activity are considered as a behavioral factor. Similarly, raised  
156 Blood Pressure is categorized as a physical factor. Raised blood sugar and raised blood  
157 cholesterol together are considered as biochemical factor. The operational definitions of the  
158 outcome variables (NCD risk factor) are presented in Table 1.

159  
160  
161  
162  
163  
164

165 **Table 1: Showing the variables used in study**

166

| Variables                          | Parameter                                                                                                                                                                                                                                                                |
|------------------------------------|--------------------------------------------------------------------------------------------------------------------------------------------------------------------------------------------------------------------------------------------------------------------------|
| <b>Prevalence:</b>                 | The occurrence of disease in a defined population in the given period of time. The total population surveyed was 5593 with 84% response rate.<br>Calculated by: $\frac{\text{Total no of people affected}}{\text{Total population at that point of time}} * 100\%$ [ 17] |
| <b>Waist and hip circumference</b> | Waist was measured using constant tension tapes (Seca, Germany) in centimeters [18].<br>Waist circumference: >102 cm (Male), >88 cm (Female) was taken into consideration for the study [19].                                                                            |
| <b>Blood Pressure</b>              | Blood pressure was measured with a digital, automated blood pressure                                                                                                                                                                                                     |

It is made available under a [CC-BY 4.0 International license](https://creativecommons.org/licenses/by/4.0/).

|                                                           |                                                                                                                                                                                                                                                                                                                                                                                                                                                                                                                                                                                                                                                                                                                                                                                                                                                                                                                   |
|-----------------------------------------------------------|-------------------------------------------------------------------------------------------------------------------------------------------------------------------------------------------------------------------------------------------------------------------------------------------------------------------------------------------------------------------------------------------------------------------------------------------------------------------------------------------------------------------------------------------------------------------------------------------------------------------------------------------------------------------------------------------------------------------------------------------------------------------------------------------------------------------------------------------------------------------------------------------------------------------|
| <b>measurements:</b>                                      | <p>monitor (OMRON digital device) with medium cuff. Before taking the measurements, participants were asked to sit quietly and rest for 15 minutes with legs uncrossed[18].</p> <p>The mean readings for sum of second and third measurements, blood pressure <math>\geq 130</math> mmHg systolic or <math>\geq 85</math> mmHg diastolic or Rx was considered for the analysis [19]</p>                                                                                                                                                                                                                                                                                                                                                                                                                                                                                                                           |
| <b>Biochemical measurements</b><br><b>Fasting glucose</b> | <ul style="list-style-type: none"><li>• <b>Fasting glucose:</b> For the measurement of <b>fasting glucose</b>, participants were instructed to fast overnight for 12 hours and diabetic patients on medication were reminded to bring their medicine/insulin with them and take their medicine after providing the blood sample Fasting glucose <math>\geq 100</math> mg/dl or Rx was taken for reference for the study [18,19]</li></ul>                                                                                                                                                                                                                                                                                                                                                                                                                                                                         |
| <b>Total cholesterol</b>                                  | <ul style="list-style-type: none"><li>• <b>Total cholesterol</b> level was screened for cardiovascular risk in STEPS Survey. The Normal value for Total Cholesterol level was <math>\geq</math><br/>5.0 mmol/l or <math>\geq 190</math> mg/dl or Rx [18,6]</li></ul> <p>The NCEP recommended that HDL cholesterol be measured in persons with high total cholesterol levels or in those with borderline high levels and a high CHD risk profile [20]. Current NCEP ATPIII guidelines appear to balance optimally the sensitivity and specificity for selecting individuals based on TC levels for further complete lipoprotein analysis [21]. Elevated TC is a well-documented and established risk factor for cardiovascular disease. One large meta-analysis based on observational studies found that high levels of serum TC was associated with an increased Coronary Heart Disease mortality rate [22].</p> |
| <b>Metabolic Syndrome</b>                                 | <p>The parameters for Waist Circumference, Fasting Glucose Level and Elevated Blood Pressure for measuring Metabolic Syndrome were taken from NCEP III criteria[19].</p> <p>Total Cholesterol parameter was taken from NCD Risk factor survey.</p>                                                                                                                                                                                                                                                                                                                                                                                                                                                                                                                                                                                                                                                                |

It is made available under a [CC-BY 4.0 International license](https://creativecommons.org/licenses/by/4.0/).

|                                                  |                                                                                                                                                                                                                                                                                                                                                                                                                                                                                   |
|--------------------------------------------------|-----------------------------------------------------------------------------------------------------------------------------------------------------------------------------------------------------------------------------------------------------------------------------------------------------------------------------------------------------------------------------------------------------------------------------------------------------------------------------------|
|                                                  | <p>Thus, assessment criteria for Metabolic Syndrome include any three of four criteria.</p> <ul style="list-style-type: none"><li>• Waist circumference: &gt;102 cm (Male), &gt;88 cm (Female)[19]</li><li>• Fasting glucose <math>\geq</math>100 mg/dl or Rx [19].</li><li>• Elevated blood pressure Rx <math>\geq</math>130 mmHg systolic or <math>\geq</math>85 mmHg diastolic or Rx [19]and</li><li>• Dyslipidemia: Total cholesterol level&gt;5.0 m/mol or Rx [18]</li></ul> |
| <b>Current tobacco:</b>                          | Those who use smoke and smokeless tobacco smoked in the past 30 days were considered as a current tobacco smoker [18].                                                                                                                                                                                                                                                                                                                                                            |
| <b>Alcohol consumption:</b>                      | The participants were classified as life time abstainers, alcohol consumed in past 12 months and consumed in past 30 days [18].                                                                                                                                                                                                                                                                                                                                                   |
| <b>Insufficient fruits and vegetable intake:</b> | It is the number of servings of fruit and vegetables consumed on average per day. Average serving of fruits and vegetables consumed per day 2.0 servings (0.5 servings of fruit and 1.5 servings of vegetables per day is sufficient[18]. Less than average serving was considered insufficient intake.                                                                                                                                                                           |
| <b>Low Physical activity:</b>                    | Global Physical Activity Questionnaire (GPAQ) was used to assess physical activities. On an average 299.2 minutes per day is adequate whereas level of physical activity less than 150min per week is inadequate [18].                                                                                                                                                                                                                                                            |
| <b>Nepalese adults:</b>                          | The adult citizen from 15-69 years of age residing in three geographical regions of Nepal.                                                                                                                                                                                                                                                                                                                                                                                        |
| <b>Ecological Zone:</b>                          | Ecological zone classify Nepal into 3 parts Himalayan, mountainous /hilly and terai /plains [18].                                                                                                                                                                                                                                                                                                                                                                                 |



It is made available under a [CC-BY 4.0 International license](https://creativecommons.org/licenses/by/4.0/) .

168 **Ethics statement:**

169 Ethical approval for conducting the study was taken from Nepal Health Research Council,  
170 Government of Nepal (Reference No. 3755, Regd. No. 77/2023, approved on 10<sup>th</sup> May,  
171 2023). The agreement from Nepal Health Research Council for utilizing Raw data of STEPS  
172 Survey was done on 17<sup>th</sup> July 2022. Written informed consent was obtained from each  
173 participant before they enrolled in the survey. In case of minors (under 18 years old) both  
174 assent from the research participants and consent from their parents (legal guardian) was  
175 obtained, as per national ethical guidelines for health research in Nepal. We also took  
176 administrative approval from federal, provincial and local governments, as per the need. The  
177 confidentiality of all information gathered was maintained. Any waste generated during the  
178 laboratory procedures was properly disinfected using aseptic techniques before being safely  
179 disposed of. All blood and urine samples were discarded after completing biochemical  
180 measurements [18].

181

182 **Global inclusivity:**

183 Additional information regarding Metabolic Syndrome on screening measures including  
184 Total Cholesterol rather than its individual component which suggest cost effectiveness in  
185 screening of MetS was included in the study. In a previous nationally representative study  
186 using STEPS Survey 2013 data, an association of Socio-economic Status (Wealth quintile)  
187 and the Metabolic Syndrome was not performed. However, due to globalization and  
188 technological modernization, the society has been changing rapidly. We, therefore  
189 investigated the relation between wealth quintile and the Metabolic Syndrome among  
190 Nepalese adults.

191

192

193

194

195

196

197

198

199

200

201

202  
203  
204  
205  
206  
207  
208  
209  
210  
211  
212  
213  
214  
215  
216  
217  
218  
219  
220  
221

## 222 **Results**

### 223 **Table 2. Socio-demographic Characteristics of Respondents**

224 Socio-demographic characteristics of the participants are summarized in Table  
225 2. Participants' age ranged from 15 to 69 years. Majority (37.33%) of the participants aged  
226 from 45-69 years. More than half (64.28%) of the participants were female. Almost  
227 (84.81%) participants were married and almost half of the participants (46.59%) reside in  
228 Hilly region. 29% had poorest quintile household assets. Almost half of the participants  
229 (49.93%) had none/primary level education. Majority of the participants (87.39%) were from  
230 rural areas.

### 232 **Table 2. Socio-demographic characteristics of respondents.**

233 **n=5593**

234

| <b>Characteristics</b>                | <b>Frequency (f)</b> | <b>Percentage (%)</b> |
|---------------------------------------|----------------------|-----------------------|
| <b>Age (in years)</b>                 |                      |                       |
| 15-29                                 | 1,466                | 26.61                 |
| 30-44                                 | 2,039                | 36.41                 |
| 45-69                                 | 2,088                | 37.33                 |
| <b>Sex</b>                            |                      |                       |
| Women                                 | 3,595                | 64.28                 |
| Men                                   | 1,998                | 35.72                 |
| <b>Level of education</b>             |                      |                       |
| None/less than primary                | 2792                 | 49.93                 |
| Primary                               | 1052                 | 18.79                 |
| Secondary                             | 1088                 | 19.46                 |
| More than secondary                   | 661                  | 11.82                 |
| <b>Marital status</b>                 |                      |                       |
| Never married                         | 487                  | 9.7                   |
| Currently Married                     | 4283                 | 84.90                 |
| Divorced/separated/widow              | 280                  | 5.4                   |
| <b>Household assets (in quintile)</b> |                      |                       |
| Poorest                               | 1652                 | 29.54                 |
| Second                                | 1063                 | 19.01                 |
| Third                                 | 948                  | 16.95                 |
| Fourth                                | 881                  | 15.75                 |
| Richest                               | 1049                 | 18.76                 |
| <b>Geographical Region</b>            |                      |                       |
| Mountain                              | 661                  | 11.8                  |
| Hill                                  | 2,606                | 46.59                 |
| Terai                                 | 2,326                | 41.58                 |
| <b>Residence</b>                      |                      |                       |
| Urban                                 | 705                  | 12.61                 |
| Rural                                 | 4888                 | 87.39                 |

235

236 **Fig 2: Trends in the Prevalence of Metabolic Syndrome between 2013 and 2019.**

It is made available under a [CC-BY 4.0 International license](https://creativecommons.org/licenses/by/4.0/).

237 The plot in the graph below “Fig 2” shows the decrease in the trend of Prevalence of  
 238 Metabolic Syndrome. The prevalence of Metabolic Syndrome is decreased to more than half  
 239 which is 14.1% in 2013 to 6.69% in 2019.

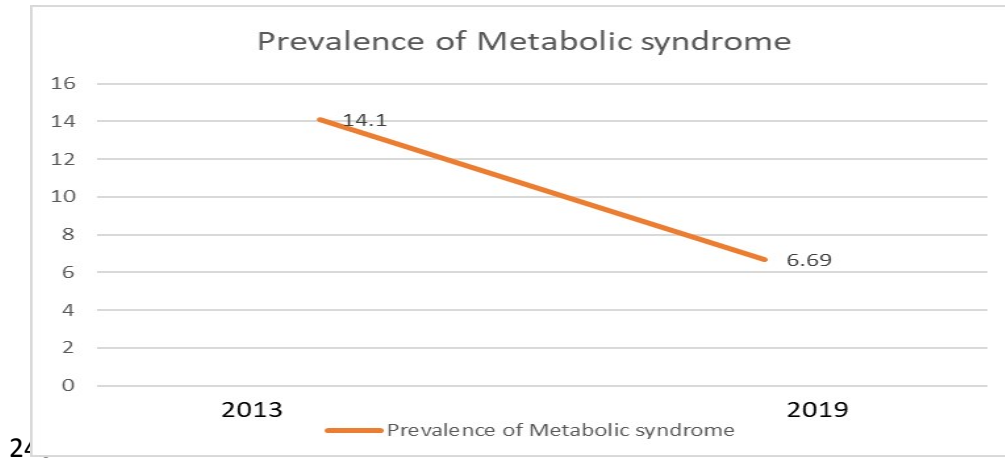

241 **Fig 2: Trend in the Prevalence of Metabolic Syndrome between 2013 and 2019.**

242

243

244

245 **Table 3. Association between Metabolic Syndrome with the socio-**  
 246 **demographic variables.**

247 Table 3 represents the bivariate analysis of Metabolic Syndrome and Socio-demographic  
 248 variables. Metabolic syndrome was higher in participants aged 45-69 years (11.95%), in  
 249 women (8.62%), who has none/less than primary education (8.81%), who are  
 250 divorced/separated (13.6%), participants living in Terai (7.77%) and richest (11.78%) in  
 251 quintile. Metabolic syndrome was significantly associated with Age, Sex, Education, Marital  
 252 status, Geographical region and Household assets in quintile  $p \leq 0.05$ .

253

**n=5051**

| Variables | Metabolic Syndrome |              | p-value |
|-----------|--------------------|--------------|---------|
|           | No<br>n (%)        | Yes<br>n (%) |         |
|           |                    |              |         |

It is made available under a [CC-BY 4.0 International license](https://creativecommons.org/licenses/by/4.0/) .

| <b>Age (in years)</b>                 |              |             |         |
|---------------------------------------|--------------|-------------|---------|
| 15-29                                 | 1262 (97.61) | 25 (2.38)   | 0.000*  |
| 30-44                                 | 1690 (91.51) | 151 (8.48)  |         |
| 45-69                                 | 1671 (88.05) | 252 (11.95) |         |
| <b>Sex</b>                            |              |             |         |
| Women                                 | 2919 (91.38) | 328 (8.62)  | 0.012*  |
| Men                                   | 1704 (95.43) | 100 (4.57)  |         |
| <b>Education</b>                      |              |             |         |
| None/less than Primary                | 2279(91.9)   | 257(8.81)   |         |
| Primary                               | 879(93.42)   | 70(6.58)    | 0.018*  |
| Secondary                             | 915(95.37)   | 65(4.63)    |         |
| More than secondary                   | 549(95.31)   | 36(4.69)    |         |
| <b>Marital status</b>                 |              |             |         |
| Never married                         | 477(97.49)   | 10(2.51)    | 0.001*  |
| Currently married                     | 3907(92.49)  | 376(7.51)   |         |
| Divorced/separated/widow              | 238(86.4)    | 43(13.6)    |         |
| <b>Household assets (in quintile)</b> |              |             |         |
| Poor                                  | 1437 (96.52) | 56 (3.47)   | 0.0002* |
| Second                                | 912 (95.44)  | 56 (4.55)   |         |
| Third                                 | 782 (93.93)  | 73 (6.07)   |         |
| Fourth                                | 703 (92.37)  | 87 (7.62)   |         |
| Richest                               | 789 (88.22)  | 156(11.78)  |         |
| <b>Geographical region</b>            |              |             |         |
| Mountain                              | 585 (97.43)  | 18 (2.57)   | 0.003*  |
| Hill                                  | 2173 (93.89) | 172 (6.11)  |         |
| Terai                                 | 1865 (92.22) | 238 (7.77)  |         |
| <b>Residence</b>                      |              |             |         |
| Urban                                 | 540(93.69)   | 77(6.31)    | 0.066   |
| Rural                                 | 4083(93.27)  | 351(6.73)   |         |

It is made available under a [CC-BY 4.0 International license](https://creativecommons.org/licenses/by/4.0/) .

254 \*  $p \leq 0.05$

255

256

257

258

259

260

261

262

263

264

265

266 **Table 4 Association of Metabolic Syndrome with behavioral**  
267 **characteristics**

268 Table 4 showed no any significant association of Metabolic Syndrome with Behavioural  
269 Characteristics.

270

**n=5051**

| <b>Behavioral Characteristics</b>          | <b>No</b>    | <b>Yes</b> | <b><i>p</i>-Value</b> |
|--------------------------------------------|--------------|------------|-----------------------|
| <b>Tobacco Consumption</b>                 |              |            |                       |
| Yes                                        | 3234 (93.17) | 318 (6.82) | 0.92                  |
| No                                         | 1389 (93.64) | 110 (6.35) |                       |
| <b>Alcohol consumption in last 30 days</b> |              |            |                       |
| No                                         | 3670 (93.23) | 347 (6.76) | 0.7415                |

It is made available under a [CC-BY 4.0 International license](https://creativecommons.org/licenses/by/4.0/) .

|                                          |              |            |        |
|------------------------------------------|--------------|------------|--------|
| Yes                                      | 953 (93.6)   | 81 (6.39)  |        |
| <b>Fruits and vegetables consumption</b> |              |            |        |
| >=5 servings                             | 131 (93.77)  | 13 (6.22)  | 0.0741 |
| < 5 servings                             | 4471 (93.26) | 415 (6.74) |        |
| <b>Physical activity</b>                 |              |            |        |
| Sufficient                               | 4223 (93.48) | 379 (6.52) | 0.8532 |
| Insufficient                             | 316 (91.3)   | 39 (8.69)  |        |

271 \*  $p \leq 0.05$

272

273

274

275

276

277 **Table 5. Multivariate analysis for association of Metabolic Syndrome with**  
278 **socio-demographic variable**

279 There was a significant association between Age and Metabolic Syndrome ( $p < 0.001$ ). The  
280 odds of having Metabolic Syndrome are 3.68 times higher among participants aged 30-44  
281 years ( $p$ -value:  $< 0.001$ , 95% CI: 1.94, 6.99) and 5.79 times higher among participants aged  
282 45-69 years ( $p$ -value:  $< 0.001$ , 95% CI: 2.77, 10.41) compared to those participants who are  
283 age of 15-29 years adjusting for sex, marital status, education, residence, geographical  
284 regions, wealth index, current use of tobacco product, alcohol consumption in last 30 days,  
285 fruits and vegetable consumption, physical activity per week. The cumulative risk for  
286 Metabolic Syndrome increased with increase in age.

287 There was significant association between Sex and Metabolic Syndrome ( $p < 0.001$ ). The  
288 odds of having Metabolic Syndrome are 2.45 times significantly higher in women (95% CI:  
289 1.57, 3.51) adjusting for age, residence, marital status, geographical region, wealth index,

It is made available under a [CC-BY 4.0 International license](https://creativecommons.org/licenses/by/4.0/) .

290 current use of tobacco product, alcohol consumption in last 30 days, fruits and vegetable  
291 consumption, adequate physical activity.

292 The higher odds of occurrence of Metabolic Syndrome was observed among rural dwellers  
293 (AOR 1.48 ; 95% CI: 0.93-2.35) as compared to urban dwellers adjusting for age, residence,  
294 marital status, geographical region, wealth index, current use of tobacco product, alcohol  
295 consumption in last 30 days, fruits and vegetable consumption, adequate physical activity.

296 There is significant association between geographical region (Terai) (p-value: 0.02, 95%  
297 CI:1.06, 3.99) and Metabolic Syndrome. The odds of having Metabolic Syndrome is 2.06  
298 times higher in those who live in the Terai region and 1.68 times higher in those who live in  
299 the mountainous region adjusting for age, residence, marital status, geographical region,  
300 wealth index, current use of tobacco product, alcohol consumption in last 30 days, fruits and  
301 vegetable consumption, adequate physical activity.

302 The odds of developing Metabolic Syndrome is 0.84 times high in those who are currently  
303 married and 1.21 times higher in those who are separated/divorced/widow, adjusting for age,  
304 residence, marital status, geographical region, wealth index, current use of tobacco product,  
305 alcohol consumption in last 30 days, fruits and vegetable consumption, adequate physical  
306 activity.

307 The odds of having Metabolic Syndrome decrease with increase in education level. The odds  
308 of having Metabolic Syndrome is 1.0 times more who have primary education and decrease  
309 odds with secondary education (AOR; 0.80) and higher secondary education (AOR; 0.79)  
310 compared to those who have no or less than primary education adjusting for age, residence,  
311 marital status, geographical region, wealth index, current use of tobacco product, alcohol  
312 consumption in last 30 days, fruits and vegetable consumption, adequate physical activity.  
313 The cumulative risk of metabolic syndrome decreased with increased level of education.

314 The odds of developing Metabolic Syndrome is 2.43 times high in those who have fourth  
315 wealth index (p-value: 0.006, 95% CI: 1.29,4.60) and 4.12 times higher in those who have  
316 highest wealth index (p-value: <0.001, 95% CI: 2.30,7.39) compared to those who have  
317 poor wealth index adjusting for age, residence, marital status, geographical region, wealth  
318 index, current use of tobacco product, alcohol consumption in last 30 days, fruits and  
319 vegetable consumption, adequate physical activity.



It is made available under a [CC-BY 4.0 International license](https://creativecommons.org/licenses/by/4.0/).

320 Age, female, education, wealth quintile Marital status and Terai residents were at increased  
321 risk of Metabolic Syndrome.

322

323

324

325

326

327

328

329

330

331

332 **Table 5. Multivariate analysis for association between socio-demographic**  
333 **variables and Metabolic Syndrome**

334

**n=5051**

| <b>Characteristics</b> | <b>Odds ratio</b> | <b>95% CI</b>   | <b>p-value</b> |
|------------------------|-------------------|-----------------|----------------|
| <b>Age (in years)</b>  |                   |                 |                |
| 15-29                  | Ref               |                 |                |
| 30-44                  | 3.68              | 1.94,6.99****   | <0.001         |
| 45-69                  | 5.79              | 2.7710.41****   | <0.001         |
| <b>Sex</b>             |                   |                 |                |
| Men                    | Ref               |                 |                |
| Women                  | 2.46              | 1.58 , 3.82**** | <0.000         |

It is made available under a [CC-BY 4.0 International license](https://creativecommons.org/licenses/by/4.0/) .

|                            |      |                |       |
|----------------------------|------|----------------|-------|
| <b>Residence</b>           |      |                |       |
| Urban                      | Ref  |                |       |
| Rural                      | 1.48 | 0.93,2.35      | 0.098 |
| <b>Marital status</b>      |      |                |       |
| Never married              | Ref  |                |       |
| Currently married          | 0.84 | 0.35,2.04      | 0.699 |
| Divorced/separated         | 1.21 | 0.48,3.08      | 0.684 |
| <b>Education</b>           |      |                |       |
| None/less than primary     | Ref  |                |       |
| Primary                    | 1    | 0.63 , 1.58    | 0.995 |
| Secondary                  | 0.8  | 0.48 , 1.33    | 0.379 |
| More than secondary        | 0.79 | 0.38 , 1.64    | 0.518 |
| <b>Wealth Index</b>        |      |                |       |
| Poorest                    | Ref  |                |       |
| Second                     | 1.46 | 0.87 - 2.44    | 0.178 |
| Middle                     | 1.82 | 0.92 - 3.60    | 0.107 |
| Fourth                     | 2.66 | 1.42 - 4.99**  | 0.006 |
| Richest                    | 4.84 | 2.65 - 8.85*** | 0.000 |
| <b>Geographical Region</b> |      |                |       |
| Mountain                   | Ref  |                |       |
| Hills                      | 1.69 | 0.88, 3.25     | 0.116 |
| Terai                      | 2.06 | 1.08, 3.95**   | 0.029 |

335 \*  $p < 0.05$ ; \*\*  $p < 0.01$ ; \*\*\*  $p < 0.001$

336 *Adjusted for age, sex, residence, marital status, education, residence, wealth index,*  
 337 *geographical regions current use of tobacco product, alcohol consumption in last 30 days,*  
 338 *fruits and vegetable consumption, adequate physical activity.*

339

340

341

342

343

It is made available under a [CC-BY 4.0 International license](https://creativecommons.org/licenses/by/4.0/) .

344

345

346

347

348

349

350

351

352

353

354

355

356

357 **Table 6. Prevalence of components of Metabolic Syndrome**

358 Table 6 depicts the Prevalence of Components of Metabolic Syndrome. The overall  
359 Prevalence of Metabolic Syndrome was 6.6%. The Prevalence was significantly double  
360 (8.62%) among women as compared to men (4.2%).The most prevalent component was  
361 High Waist Circumference (63.6%) that was significantly high among women followed by  
362 Elevated Blood Pressure (29.8.%) which was significantly high among men. Total  
363 Cholesterol (10.8%) was observed in both Sex which was significantly high (13.9%) among  
364 women. Among the components observed, Raised blood sugar was least prevalent (6.3%) in  
365 both sex which was observed more (5.3%) among the women. Majority (93.4%) of  
366 respondents has less than 3 components and was significantly less among Men.

| <b>Metabolic Components</b> | <b>Women%</b> | <b>Men%</b> | <b>Both Sex%</b> | <b><i>p-value</i></b> |
|-----------------------------|---------------|-------------|------------------|-----------------------|
|-----------------------------|---------------|-------------|------------------|-----------------------|

It is made available under a [CC-BY 4.0 International license](https://creativecommons.org/licenses/by/4.0/) .

|                                               |       |       |       |         |
|-----------------------------------------------|-------|-------|-------|---------|
| High waist hip ratio (n=5518)                 | 70.2  | 56.3  | 63.6  | 0.000*  |
| Elevated blood pressure<br>(n=5506)           | 19.7  | 29.8  | 24.75 | 0.000*  |
| Elevated Total blood cholesterol<br>(n= 5342) | 13.9  | 7.7   | 10.8  | 0.000*  |
| Raised blood sugar (n=5191)                   | 5.3   | 4.2   | 6.3   | 0.282   |
| Metabolic syndrome (n=5051)                   | 8.62  | 4.57  | 6.6   | 0.001*  |
| 0 or < 3 components (n=5051)                  | 51.21 | 48.79 | 93.4  | 0.0002* |

367 \*  $p < 0.05$

368

369

### 370 **Table 7. Clustering of components of Metabolic Syndrome**

371 Clustering of Components of Metabolic Syndrome was observed among the respondents in  
 372 Table 8. A triad of blood pressure, blood sugar and Total Cholesterol (n=219) constitutes  
 373 3.59% in both sex and was common among women (54.85%) followed by triad of waist hip  
 374 ratio, blood pressure and blood sugar (n=185) that constitutes of 3% in both sex and was  
 375 significantly high among women. Triad of waist hip ratio, blood pressure and total  
 376 cholesterol (n=134), 1.94% was noticeable in both sex and showed significantly high among  
 377 women. A triad of waist hip, blood sugar and Total Cholesterol (n=97) was least dominant  
 378 i.e. 1.41% was seen in both sex and was significantly high among women. Clustering of all  
 379 four components (Waist hip Circumference +Elevated Blood Pressure Raised Blood  
 380 Sugar+Total Cholesterol) was seen among 1.09% of Respondents and was significantly high  
 381 among Women. Hence, clustering of Components of Metabolic Syndrome components was  
 382 found to be high among women.

It is made available under a [CC-BY 4.0 International license](https://creativecommons.org/licenses/by/4.0/).

| <b>Clustering of Metabolic Components</b>                                                | <b>Women%</b> | <b>Men%</b> | <b><i>p-value</i></b> |
|------------------------------------------------------------------------------------------|---------------|-------------|-----------------------|
| Waist hip Ratio+ Blood pressure+ Total cholesterol (n=134)                               | 89.49         | 10.51       | 0.001*                |
| Waist hip Ratio+ Elevated Blood Pressure+ Elevated Blood sugar (n=185)                   | 90.49         | 26.86       | 0.0067*               |
| Waist hip Ratio + Elevated Blood Sugar + Total Cholesterol (n=97)                        | 91.49         | 14.26       | 0.000*                |
| Elevated Blood Pressure+ Elevated Blood Sugar + Total Cholesterol (n=219)                | 92.49         | 41.92       | 0.000*                |
| Waist hip Ratio+ Elevated Blood Pressure+ Elevated Blood Sugar+ Total Cholesterol (n=66) | 93.49         | 17.03       | 0.0016*               |
|                                                                                          |               |             |                       |

383 \***p<0.05**

384

385

## 386 **Discussion**

387 The present study demonstrated that the overall prevalence of Metabolic Syndrome was  
388 6.69% which shows decrease in trend from 12.1% in 2013 to 6.69% in 2019 (Figure 2).The  
389 study is in contrast with the Prevalence of Metabolic Syndrome among South Asian  
390 countries (ATPIII 26.1% and IDF 29.8%) reported by a systematic review [23].Similarly, the  
391 study is in line with the study that showed the prevalence of the Metabolic Syndrome was  
392 lower in populations of Asian origin compared with what has previously been reported for  
393 Caucasians[24] .The decrease in trend of Metabolic Syndrome in Nepal may be related to  
394 decrease in the prevalence of Total Cholesterol in 2019. The prevalence of Raised Total  
395 Cholesterol in STEPS Survey 2019 is quite low (11%) as compared with previous rounds of  
396 the STEPS Survey in 2013 i. e. 22.7%;[18] and also may be due to differences in  
397 measurement criteria (Table 1). Education status also play vital role in creating awareness  
398 regarding health risk.

It is made available under a [CC-BY 4.0 International license](https://creativecommons.org/licenses/by/4.0/).

399 Socio-demographic characteristics like Age, Sex, Education, Marital Status, Geographical  
400 region and Household assets in quintile have statistical significant association with  
401 Metabolic Syndrome which is consistent with the study in Nepal [25].

402 In the present study, Behavioural factors has no association with Metabolic Syndrome which  
403 was in line with the study conducted in USA where Lifestyle factors had no significant  
404 association with metabolic syndrome [26].

405 Higher Trend of Metabolic Syndrome was observed among women (8.62%) than on  
406 men (4.57%) with the most prevalent three metabolic components in women (High Waist  
407 Circumference: 70.2% of women, 5.3% of men, Elevated Total Cholesterol: 13.9% of  
408 women; 7.7% of men; Raised blood sugar 5.3% in women; 4.2% in men) (Table 7) was  
409 found to be supported by study in India [27]. Conversely, the prevalence of MetS in  
410 China was higher among men than women and also the prevalence of the four metabolic  
411 abnormalities included in the diagnosis of Metabolic Syndrome were also higher in men  
412 than in women [28]. Similar findings on the study at India, showed the pooled prevalence  
413 of MS among adult women was more 35% (95%CI: 31%-38%); than men, the pooled  
414 prevalence was 26% (95%CI: 22%-29%) [29]. These results support the existing  
415 research findings that women experience physiological changes that make them  
416 susceptible to metabolic syndrome with aging. Menopause, characterized by a decline in  
417 circulating estrogen levels, may increase cardiovascular risk through its effects on  
418 adiposity and lipid metabolism. The sex differences in Metabolic Syndrome may be  
419 related with biological and behavioral factors [30]. The factors associated with NCDs  
420 among female were due to long working hours, double work burden, and stress which  
421 keeps them busy with managing the household activities that reduces the time for  
422 physical fitness [31]. The prevalence of physical inactivity was found to be doubled in  
423 STEPS SURVEY 2019 and is found to be more in women than in men and is associated  
424 with richest wealth quintile [32], unemployment and easy access to transportation  
425 [33], lower social classes, as defined by education and occupational classification [34]  
426 and low education among females [35].

427 There was significant difference between Metabolic Syndrome with Age. The prevalence of  
428 Metabolic Syndrome rose progressively with age and is high enough at the forty to sixty  
429 decades of age. Prevalence of Metabolic Syndrome was found to be more with increase in  
430 age which may be due to ageing process association with increased adiposity that eventually

It is made available under a [CC-BY 4.0 International license](https://creativecommons.org/licenses/by/4.0/) .

431 leads to deposition of adipose fast and pathological hormonal deficiencies. The increasing  
432 pro inflammatory factors with aging are disruptive to insulin receptor signaling in adipocytes  
433 and are associated with development of diabetes and other metabolic diseases [36].The age-  
434 related adipose tissue dysfunction leads to the consequent systemic inflammation and  
435 metabolic dysfunction [37].

436 There was significant difference between Metabolic Syndrome with education with a lower  
437 prevalence found in most educated respondents and high prevalence was noticed in the  
438 respondents who had less than primary and the prevalence was decreased with increment in  
439 educational status. The study was related with the study done in China which showed Lower  
440 education level was associated with higher risk of MetS [38].This may be due to  
441 accessibility of awareness and concern among educated people on the health benefits and  
442 risk which help them to adopt health preventive and promotive measures [39].

443 Metabolic Syndrome was found to be significantly associated with Marital status. The odds  
444 of having Metabolic syndrome was high among divorced/ separated then that of ever married  
445 and currently married women which is similar with the study conducted in Korea among  
446 Korean married women where the married middle-aged group, the widowed middle-aged  
447 group tended to have a higher risk of Metabolic Syndrome, which is predicted to be related  
448 to socioeconomic factors, health behavior [40] and marital distress[41].Women in high-  
449 quality marriages are at lower risk of developing the metabolic syndrome[42].

450 Metabolic Syndrome is significantly associated with the fourth and richest quintile. The odds  
451 of having Metabolic Syndrome was more than double in fourth quintile and more than four  
452 times in richest quintile as compared to the poorest quintile. Various studies suggests that  
453 sedentary habits, behavior problems related to health, low prevalence of physical activity,  
454 stress and eating habit are prominent with increased in assets[18].

455 Metabolic Syndrome was found to be ecologically associated. There was strong association  
456 of Metabolic Syndrome with geographical region. The study was in line with the study that  
457 showed the prevalence of multi-morbidity was more in low altitude [43]. Terai region  
458 geographically lies in low altitude where culture and traditions linked with food preparation  
459 and consumption, dietary habits, adoption of behavioral risk factor, climate and stress  
460 increases the risk of NCD [44]. In contrast Urbanization, specifically rurality and high-

It is made available under a [CC-BY 4.0 International license](https://creativecommons.org/licenses/by/4.0/) .

461 altitude mainly  $\geq 2,500$  meters above sea level (m.a.s.l.), were factors independently  
462 associated with lower predicted Cardiovascular risk [45].

463 The higher Prevalence of components of Metabolic Syndrome identified in the study was  
464 high Waist Circumference which was more among the Women. In contrary, the prevalence  
465 of MetS from nationally representative population addressed the most predominant  
466 component was low HDL cholesterol among female population [25].

467

468

469

470

471

472

473

474

#### 475 **CONCLUSION:**

476 It was concluded that there was a decrease in Trend of Prevalence of Metabolic Syndrome in  
477 Nepal. The prevalence of Metabolic Syndrome was considerably double in Women than in  
478 Men. Age, Sex, Education, Marital Status, wealth quintile and ecological regions are  
479 associated factors for Metabolic Syndrome. High Waist Circumference among women was the  
480 most prevalent component of Metabolic Syndrome.

481

#### 482 **RECOMMENDATIONS**

483 Metabolic Syndrome increases the risk of Cardiovascular disease. To decrease the mortality  
484 and morbidity associated with cardiovascular disease, screening on MetS could be helpful.



It is made available under a [CC-BY 4.0 International license](https://creativecommons.org/licenses/by/4.0/) .

485 Cost effective measures should be taken to perform screening measures. Total cholesterol  
486 solely can be utilized instead of HDL and LDL that can economize the screening for MetS.  
487 The recommendations for identifying high risk individuals are based on screening measures  
488 of total cholesterol, although the recommendations for treatment are based on concentrations  
489 of LDL cholesterol. Total cholesterol was recommended as the initial screening test for three  
490 reasons: High levels of LDL cholesterol are associated with an increased risk of CHD; there  
491 is a high correlation between total cholesterol and LDL cholesterol; and testing for total  
492 cholesterol is easier and less expensive than testing for LDL. The NCEP recommended that  
493 HDL cholesterol be measured in persons with high total cholesterol levels or in those with  
494 borderline high levels and a high CHD risk profile [20]. Current health Plan could include  
495 the screening of MetS to address burden of Cardiovascular disease in WHO PEN module  
496 package to decrease the burden of cardiovascular related premature mortality and morbidity.  
497 Marital status appears to be related to cardiovascular disease in among women, it is  
498 important to provide lipid screening and educational programs to improve women's lifestyle  
499 based on their marital status. High waist circumference among women highlights the  
500 urgency of addressing abdominal obesity in health care priority.

501 **Conflict of Interest:** The authors declares for no any conflict of interest with this  
502 study.

503

504

505 **Acknowledgement:** The author would like to acknowledge University Grant  
506 Commission (UGC) to provide partial scholarship for conducting this study. The authors  
507 would like to offer gratitude to Nepal Health Research council for providing raw data.  
508 The author is grateful to University of Cyberjaya for providing necessary assistance for  
509 the study.

510

511 **Authors Contribution:**

512 **Conceptualization:** Bhawana Bhandari, Suresh Mehata, Datin Mariyani Ahamad

It is made available under a [CC-BY 4.0 International license](https://creativecommons.org/licenses/by/4.0/) .

513

Niruzzudin.

514

**Formal Analysis:** Bihumgum Bista, Bhawana Bhandari

515

**Funding Support:** University Grant Commission

516

**Funding aquisition:** Bhawana Bhandari

517

**Investigation:** WHO STEPS Survey 2019

518

**Project administration:** Megnath Dhimal, Bihumgum Bista

519

**Methodology:** Bhawana Bhandari, Suresh Mehata, Bihumgum Bista

520

**Software:** Bihumgum Bista

521

**Supervision:** Suresh Mehata, Datin Mariyani Niruzzadin Ahmad.

522

**Writing : Original draft:** Bhawana Bhandari

523

524

## 525 **References:**

526

1. Lopez AD, Mathers CD. Measuring the global burden of disease and epidemiological

527

transitions: 2002–2030. *Ann Trop Med Parasitol*. 2006 Aug 1;100(5-6):481-499.

528

2. World Health Organization. Noncommunicable diseases [Internet]. Geneva: WHO; 2020

529

[cited 2020 Aug 19]. Available from: [http://www.emro.who.int/noncommunicable-](http://www.emro.who.int/noncommunicable-diseases/causes/index.html)

530

[diseases/causes/index.html](http://www.emro.who.int/noncommunicable-diseases/causes/index.html)

531

3. GBD 2015 Risk Factors Collaborators. Global, regional, and national comparative risk

532

assessment of 79 behavioural, environmental and occupational, and metabolic risks or

533

clusters of risks, 1990–2015: a systematic analysis for the Global Burden of Disease

534

Study 2015. *Lancet*. Available from: [https://www.who.int/news-room/fact-](https://www.who.int/news-room/fact-sheets/detail/noncommunicable-diseases)

535

[sheets/detail/noncommunicable-diseases](https://www.who.int/news-room/fact-sheets/detail/noncommunicable-diseases)

It is made available under a [CC-BY 4.0 International license](https://creativecommons.org/licenses/by/4.0/) .

- 536 4. Nepal Health Research Council, Ministry of Health and Population, Monitoring Evaluation and  
537 Operational Research. Nepal Burden of Disease 2017: A Country Report based on the Global  
538 Burden of Disease 2017 Study. Kathmandu (Nepal): NHRC, MoHP, MEOR; 2019. Available  
539 from: [https://nhrc.gov.np/wp-content/uploads/2019/04/NBoD-2017\\_NHRC-MoHP.pdf](https://nhrc.gov.np/wp-content/uploads/2019/04/NBoD-2017_NHRC-MoHP.pdf)
- 540 5. Deepa M, Farooq S, Datta M, Deepa R, Mohan V. Prevalence of metabolic syndrome  
541 using WHO, ATPIII and IDF definitions in Asian Indians: the Chennai Urban Rural  
542 Epidemiology Study (CURES-34). *Diabetes Metab Res Rev*. 2007 Feb;23(2):127-34.  
543 doi: 10.1002/dmrr.658. PMID: 16752431.
- 544 6. Alberti KGMM, Zimmet P. The metabolic syndrome—a new worldwide definition. *Lancet*.  
545 2005;366(9491):1059-62.  
546
- 547 7. Sullivan DR. Screening for cardiovascular disease with cholesterol. *Clin Chim Acta*. 2002;315(1-  
548 2):49-60.
- 549 8. Yu M, Xu CX, Zhu HH, Hu RY, Zhang J, Wang H, et al. Associations of cigarette  
550 smoking and alcohol consumption with metabolic syndrome in a male Chinese  
551 population: a cross-sectional study. *J Epidemiol*. 2014 Sep 5;24(5):361-9.
- 552  
553
- 554 9. Mirmiran P, Noori N, Azizi F. A prospective study of determinants of the metabolic syndrome in  
555 adults. *Nutr Metab Cardiovasc Dis*. 2008 Oct 1;18(8):567-73.
- 556 10. Alberti G. Department of Endocrinology and Metabolic Medicine, Mint Wing, St. Mary's  
557 Hospital, Praed Street, London W2 1NY, UK. *Eur Heart J Suppl*. 2005;7(Suppl D)–  
558 D5. doi:10.1093/eurheartj/sui021.
- 559 11. Vaidya A. Tackling cardiovascular health and disease in Nepal: epidemiology, strategies  
560 and implementation. *Heart Asia*. 2011;3:87–9.
- 561 12. Dhimal M, Bista B, Bhattarai S, Dixit L, Hyder M, Agrawal N, et al. Report of Non  
562 Communicable Disease Risk Factors: STEPS Survey Nepal 2019. Kathmandu: Nepal  
563 Health Research Council, 2020.

It is made available under a [CC-BY 4.0 International license](https://creativecommons.org/licenses/by/4.0/) .

- 564 13. Sapkota BP, Baral KP, Rehfuess EA, Parhofer KG, Berger U. Effects of age on non-  
565 communicable disease risk factors among Nepalese adults. PLoS One. 2023 Jun  
566 2;18(6):e0281028.
- 567 14. World Health Organization. The STEPS Instrument and Support Materials [Internet]. Geneva:  
568 WHO; 2020 [cited 2020 Aug 14]. Available from:  
569 <https://www.who.int/ncds/surveillance/steps/instrument/en/>
- 570 15. World Health Organization. WHO STEPS surveillance manual. Geneva: WHO; 2018.
- 571 16. Barros AJ, Hirakata VN. Alternatives for logistic regression in cross-sectional studies: an  
572 empirical comparison of models that directly estimate the prevalence ratio. BMC Med Res  
573 Methodol. 2003;3(1):21. PMID: 14567763.
- 574 17. Park K. PARK'S TEXTBOOK OF PREVENTIVE AND SOCIAL MEDICINE. 26th ed. Jabalpur: M/s  
575 Banarsidas Bhanot Publisher; 2021. p. 69-70.
- 576 18. Bista B, Dhimal M, Bhattarai S, Neupane TY, Xu YY, Pandey AR, et al. Prevalence of  
577 non-communicable diseases risk factors and their determinants: Results from STEPS  
578 survey 2019, Nepal. PLoS One. 2021;16(7). doi: 10.1371/journal.pone.0253605.
- 579 19. Cornier MA, Dabelea D, Hernandez TL, Lindstrom RC, Steig AJ, Stob NR, et al. The  
580 metabolic syndrome. Endocr Rev. 2008 Dec 1;29(7):777-822.
- 581
- 582 20. Bush TL, Riedel D. Screening for total cholesterol. Do the National Cholesterol  
583 Education Program's recommendations detect individuals at high risk of coronary heart  
584 disease?. Circulation. 1991 Apr;83 (4):1287-93.
- 585 21. Gelskey DE, Young TK, MacDonald SM. Screening with total cholesterol: determining  
586 sensitivity and specificity of the National Cholesterol Education Program's guidelines  
587 from a population survey. Journal of clinical epidemiology. 1994 May 1;47(5):547-53.
- 588 22. Jung E, Kong SY, Ro YS, Ryu HH, Shin SD. Serum cholesterol levels and risk of  
589 cardiovascular death: A systematic review and a dose-response meta-analysis of  
590 prospective cohort studies. Int J Environ Res Public Health. 2022;19(14):8272. doi:  
591 10.3390/ijerph19148272.

It is made available under a [CC-BY 4.0 International license](https://creativecommons.org/licenses/by/4.0/) .

- 592 23. Aryal N, Wasti SP. The prevalence of metabolic syndrome in South Asia: a systematic review. Int  
593 J Diabetes Dev Ctries. 2016;36:255–62. doi: 10.1007/s13410-015-0365-  
594 5.<https://doi.org/10.1007/s13410-015-0365-5>
- 595 24. DECODA Study Group. Prevalence of the metabolic syndrome in populations of Asian  
596 origin: Comparison of the IDF definition with the NCEP definition. Diabetes Research  
597 and Clinical Practice. 2007 Apr 1;76(1):57-67.
- 598 25. Mehata, S., Shrestha, N., Mehta, R., Bista, B., Pandey, A., & Mishra, S. (2018).  
599 Prevalence of the Metabolic Syndrome and its determinants among Nepalese adults:  
600 Findings from a nationally representative cross-sectional study. Scientific Reports,  
601 8(1).<https://doi.org/10.1038/s41598-018-33177-5>
- 602 26. Bhanushali CJ, Kumar K, Wutoh AK, Karavatas S, Habib MJ, Daniel M, Lee E.  
603 Association between lifestyle factors and metabolic syndrome among African  
604 Americans in the United States. Journal of nutrition and metabolism.  
605 2013;2013(1):516475.  
606
- 607 27. Kaur J. Assessment and Screening of the Risk Factors in Metabolic Syndrome. *Medical*  
608 *Sciences 2014; 2(3):140-152.* <https://doi.org/10.3390/medsci2030140>
- 609 28. Lan Y, Mai Z, Zhou S, Liu Y, Li S, Zhao Z, et al. (2018) Prevalence of metabolic  
610 syndrome in China: An up-dated cross-sectional study. PLoS ONE 13(4): e0196012.  
611 <https://doi.org/10.1371/journal.pone.0196012>.
- 612 29. Krishnamoorthy Y, Rajaa S, Murali S, Rehman T, Sahoo J, et al. (2020) Prevalence of  
613 metabolic syndrome among adult population in India: A systematic review and meta-  
614 analysis. PLOS ONE 15(10): e0240971. <https://doi.org/10.1371/journal.pone.0240971>  
615
- 616 30. Yi Y, An J. Sex differences in risk factors for metabolic syndrome in the Korean  
617 population. International Journal of Environmental Research and Public Health. 2020  
618 Dec;17(24):9513.
- 619 31. Idris, I. B., Azit, N. A., Ghani, S. R. A., Nor, S. F. S., & Nawi, A. M. (2021). A  
620 systematic review on non-communicable diseases among working women. *Industrial*  
621 *health, 59(3), 146-160.*

It is made available under a [CC-BY 4.0 International license](https://creativecommons.org/licenses/by/4.0/) .

- 622 32. Central Bureau of Statistics. Nepal living standard survey 2010/11. Kathmandu:  
623 National Planning Commission Secretariat, Government of Nepal, 2011
- 624 33. Aryal KK, Mehata S, Neupane S, Vaidya A, Dhimal M, Dhakal P, Rana S, Bhusal CL,  
625 Lohani GR, Paulin FH, Garg RM. The burden and determinants of non-communicable  
626 diseases risk factors in Nepal: findings from a nationwide STEPS survey. *PloS one*.  
627 2015 Aug 5;10(8):e0134834.
- 628 34. Santos AC, Ebrahim S, Barros H. Gender, socio-economic status and metabolic  
629 syndrome in middle-aged and old adults. *BMC Public Health*. 2008 Dec;8:1-8.
- 630 35. Wamala SP, Lynch J, Horsten M, Mittleman MA, Schenck-Gustafsson K, Orth-Gomer  
631 K. Education and the metabolic syndrome in women. *Diabetes care*. 1999 Dec  
632 1;22(12):1999-2003.
- 633 36. Gregor MF, Hotamisligil GS. Inflammatory mechanisms in obesity. *Annual review of*  
634 *immunology*. 2011 Apr 23;29(1):415-45
- 635 37. Yu P, Yuan R, Yang X, Qi Z. Adipose tissue, aging, and metabolism. *Current Opinion in*  
636 *Endocrine and Metabolic Research*. 2019 Mar 1;5:11-20.
- 637 38. Zhan Y, Yu J, Chen R, Gao J, Ding R, Fu Y, Zhang L, Hu D. Socioeconomic status and  
638 metabolic syndrome in the general population of China: a cross-sectional study. *BMC*  
639 *public health*. 2012 Dec;12:1-7.
- 640 39. Wang, Y., Chen, J., Wang, K. *et al*. Education as an important risk factor for the  
641 prevalence of hypertension and elevated blood pressure in Chinese men and women. *J*  
642 *Hum Hypertens* **20**, 898–900 (2006). <https://doi.org/10.1038/sj.jhh.1002086>
- 643 40. Jung YA, Kang LL, Kim HN, Park HK, Hwang HS, Park KY. Relationship between  
644 marital status and metabolic syndrome in Korean middle-aged women: the sixth Korea  
645 National Health and Nutrition Examination Survey (2013–2014). *Korean journal of*  
646 *family medicine*. 2018 Sep;39(5):307.

It is made available under a [CC-BY 4.0 International license](https://creativecommons.org/licenses/by/4.0/) .

- 647 41. Whisman MA, Uebelacker LA, Settles TD. Marital distress and the metabolic syndrome:  
648 linking social functioning with physical health. *Journal of family psychology*. 2010  
649 Jun;24(3):367.
- 650 42. Troxel WM, Matthews KA, Gallo LC, Kuller LH. Marital quality and occurrence of the  
651 metabolic syndrome in women. *Archives of internal medicine*. 2005 May  
652 9;165(9):1022-7.
- 653 43. Miranda JJ, Bernabe-Ortiz A, Gilman RH, et al. Multimorbidity at sea level and high-  
654 altitude urban and rural settings: The CRONICAS Cohort Study. *Journal of*  
655 *Comorbidity*. 2019;9. doi:10.1177/2235042X19875297
- 656 44. SEARO W. Expert meeting on population sodium reduction strategies for prevention and  
657 control of NCDs in South East Asia region.  
658 [http://www.searo.who.int/entity/noncommunicable\\_diseases/documents/sea\\_ncd\\_88.p](http://www.searo.who.int/entity/noncommunicable_diseases/documents/sea_ncd_88.pdf)  
659 [df](http://www.searo.who.int/entity/noncommunicable_diseases/documents/sea_ncd_88.pdf) (2012). Accessed 14 Dec 2016.
- 660 45. Bernabe-Ortiz A, Carrillo-Larco RM. Urbanization, Altitude and Cardiovascular Risk.  
661 *Glob Heart*. 2022 Jun 21;17(1):42. doi: 10.5334/gh.1130. PMID: 35837362; PMCID:  
662 PMC9231580.
- 663
- 664

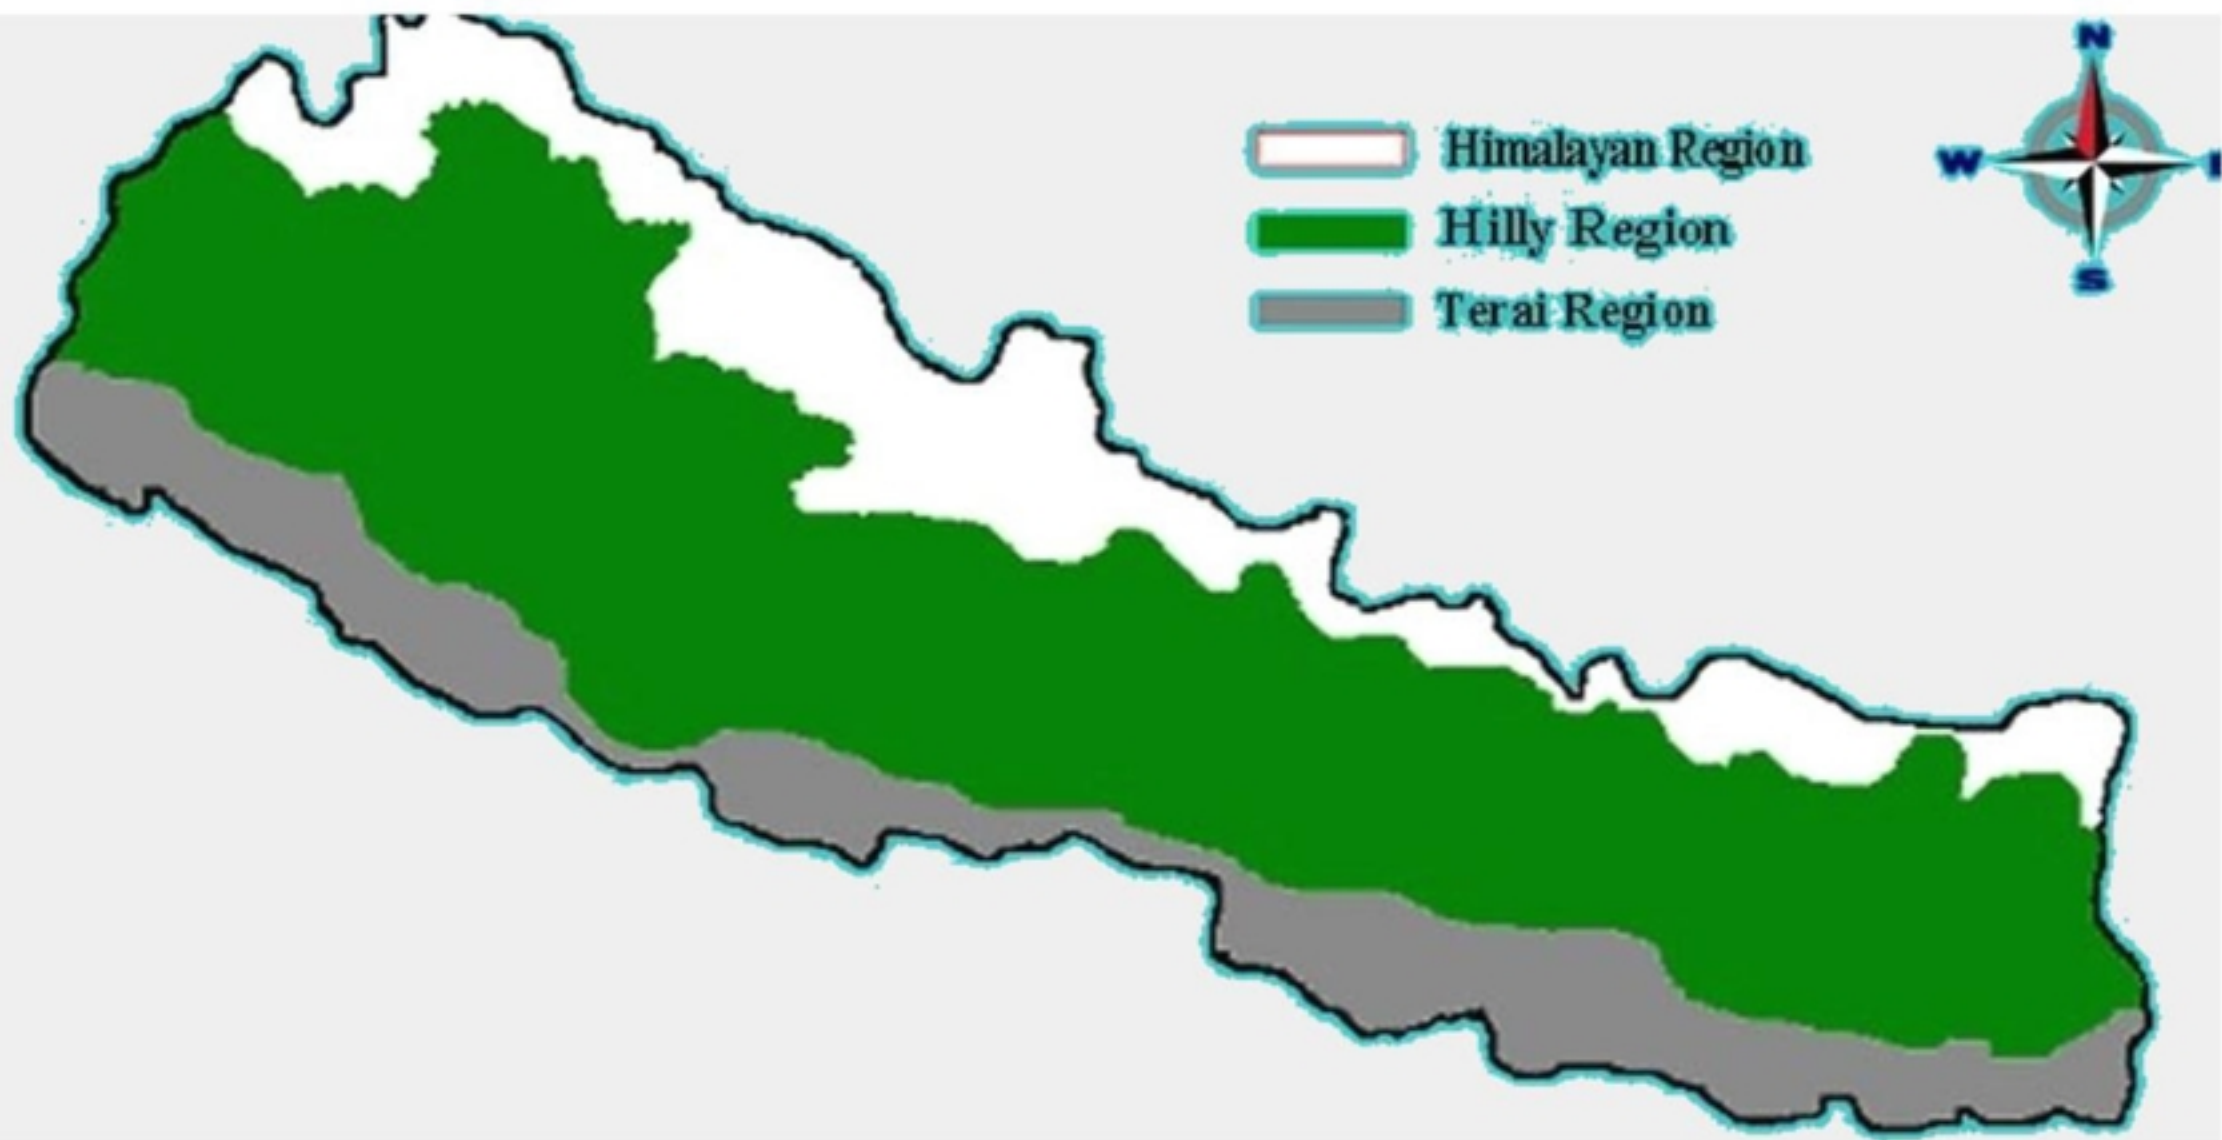

Fig 1
